# Supplementary material
Source: PubMed Central journal article supplement (PMC4057997)

Supplemental Figure 1

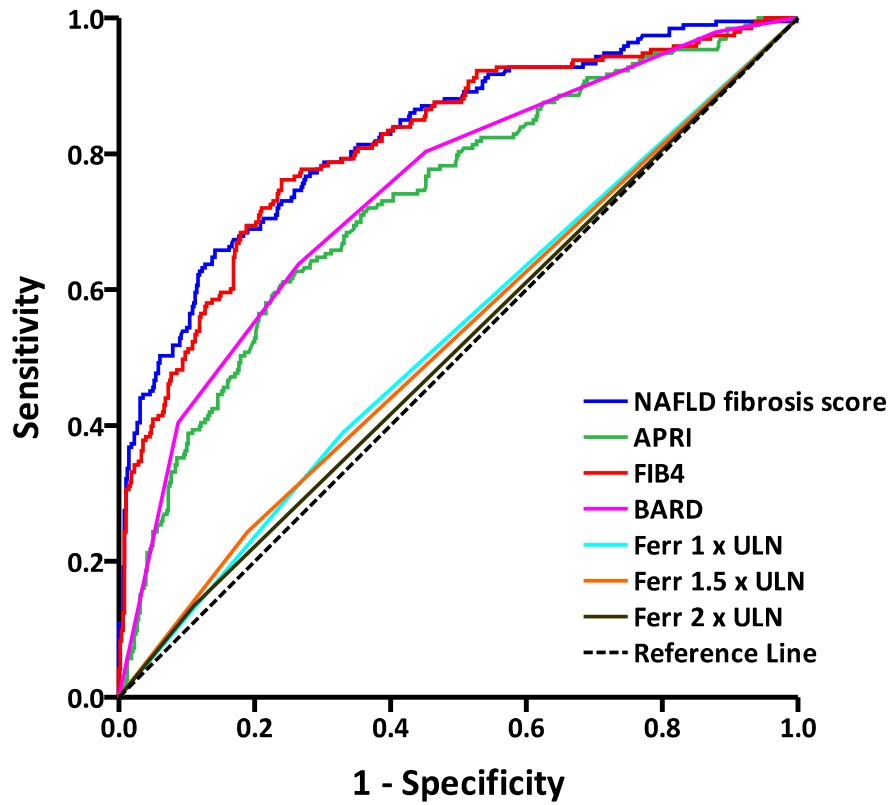

## Supplemental Figure 2

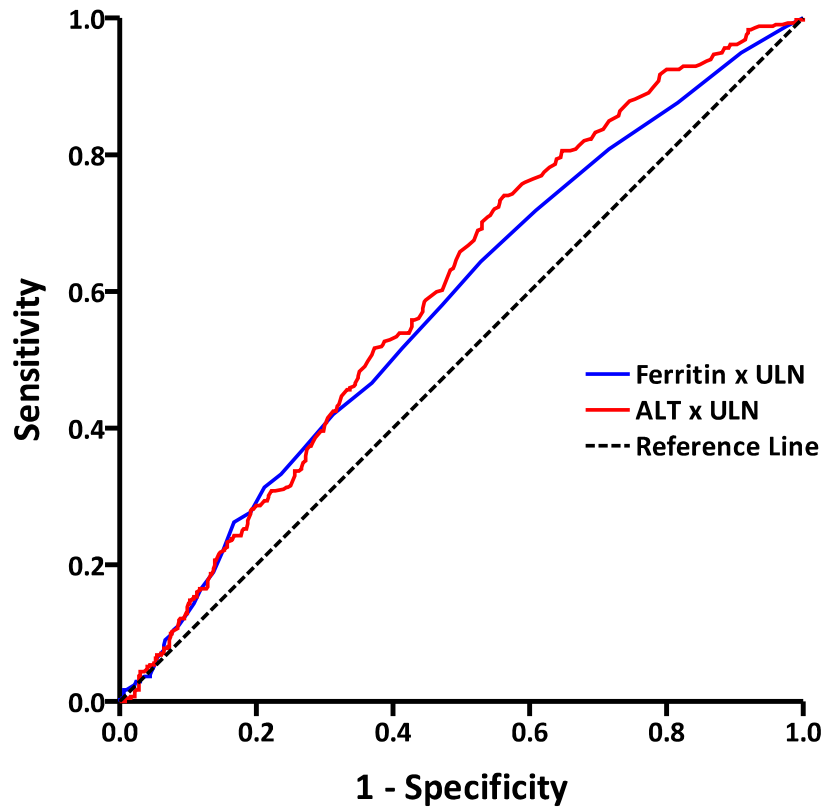

ACCEPTED

Supplement: NIHMS550462-supplement-01.pdf [file NIHMS550462-supplement-01.pdf]
